# Supplementary figures and images for: Variation Analysis in Premenopausal and Postmenopausal Breast Cancer Cases
Source: MDPI journal article supplement (doi:10.3390/jpm14040434), 2024-04-20

Supplementary materials

Figure S1. (a) HER2+ FISH image (b) HER2- FISH image

S1a.

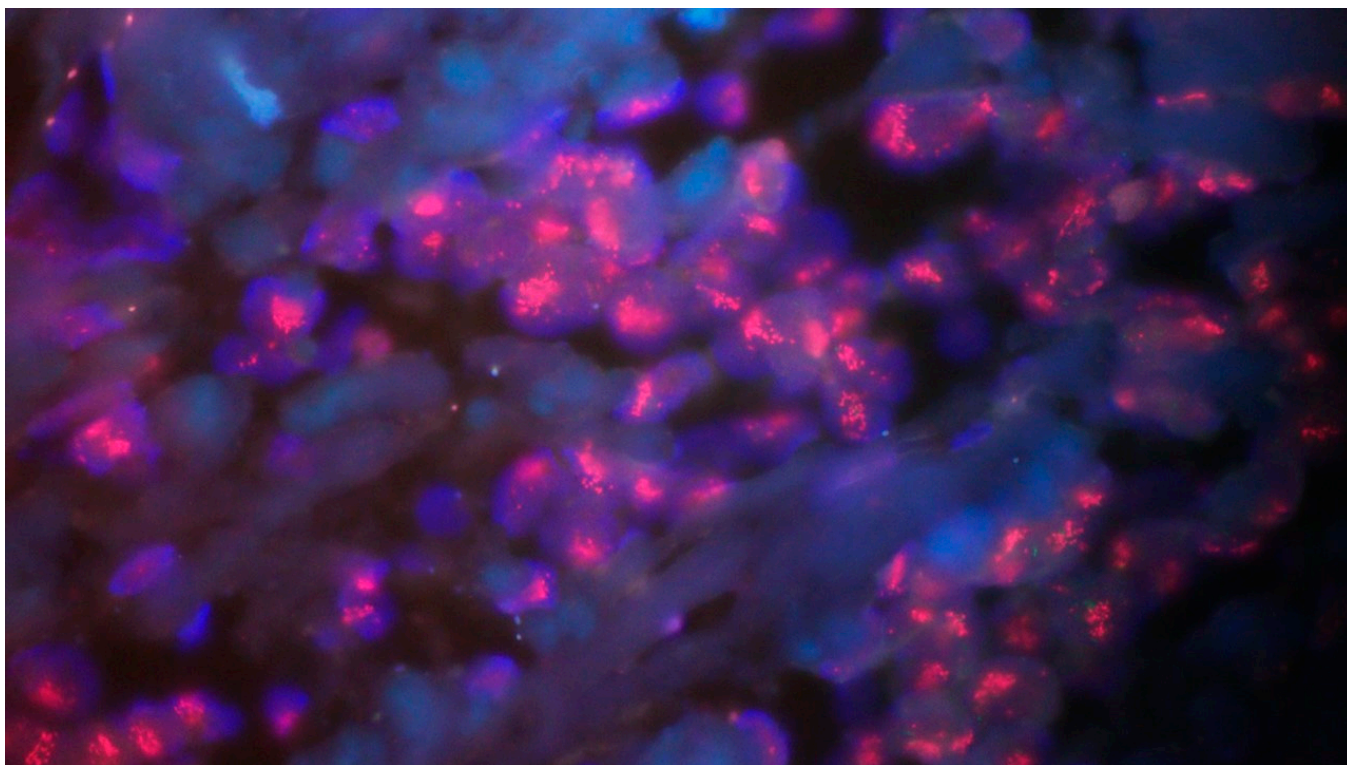

S1b.

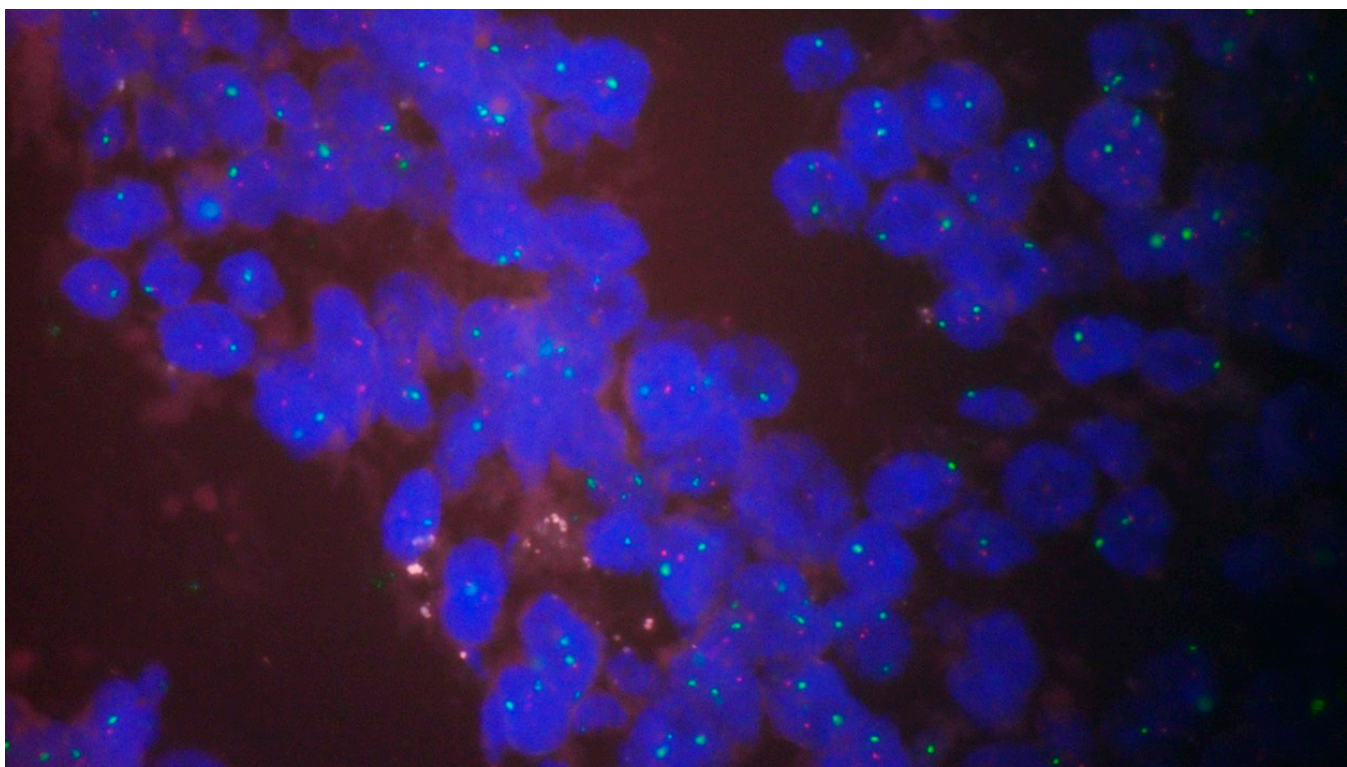

Supplement: s1 [file s1]
